# Supplementary material for: Tuning the electrocatalytic nitric oxide reduction activity of copper through alloying with nickel for NH3 production at low overpotentials
Source: Royal Society of Chemistry journal article supplement (doi:10.1039/d4ta01662a), 2024-01-01
Supplement: d4ta01662a1.pdf [file d4ta01662a1.pdf]

*Supporting Electronic Information*

Tuning the Electrocatalytic Nitric oxide Reduction  
activity of Copper through Alloying with Nickel for  
NH<sub>3</sub> production at low Overpotentials

*Harish Reddy Inta, Dinesh Dhanabal, Song Yuyeon and Sangaraju Shanmugam\**

Department of Energy Science and Engineering, Daegu Gyeongbuk Institute of Science &  
Technology (DGIST), Daegu 42988, Republic of Korea

\*E-mail: [sangarajus@dgist.ac.kr](mailto:sangarajus@dgist.ac.kr)

## Experimental Section

### *Electrochemical Measurements*

For the electrode preparation, the homogenous catalyst ink was prepared by dispersing the catalyst powder (2 mg) in isopropanol (240  $\mu\text{L}$ ), DIW (40  $\mu\text{L}$ ), and 5 wt% Nafion solution (10  $\mu\text{L}$ ) with the aid of ultrasonication for 30 min. The catalytic ink was loaded onto the microporous carbon layer of GDL through the brush-coating method and subsequently dried in the oven. The electrocatalytic nitric oxide reduction reaction (NORR) activity of the materials is evaluated through the half-cell studies by using a two-compartment H-type cell. The compartments are separated by an anion exchange membrane which was pretreated with NaCl (to remove the membrane additives) and KOH solutions (to convert the membrane into  $\text{OH}^-$  form), respectively. The electrochemical measurements were performed by filling nearly 80% of the cell volume with 1M KOH electrolyte (85 ml) in both compartments. The catalyst coated GDE, Hg/HgO (1M KOH), and Graphite rod were used as working, reference, and counter electrodes. Prior to the measurements the Ar gas was purged into the electrolyte for 30 min to remove the dissolved oxygen. Throughout the NORR studies, the Ar flow was continued through the headspace (over the electrolyte level) of the cell to prevent the  $\text{NO}_2$  formation (resulting from the reaction between nitric oxide and the residual oxygen). For NORR studies, the electrolyte was saturated with 99.9% NO (flow rate: 1 sccm) for 30 minutes. The linear sweep voltammetry was performed in the voltage window of +0.7 V to -0.7 V (vs. RHE) at a scan rate of 5  $\text{mVs}^{-1}$ . Chronoamperometric (CA) studies were performed at various potentials with regular intervals. All the potential values are converted into RHE scale by using the following Nernst equation.

$$E_{\text{RHE}} = E_{\text{working}} + E_{\text{Hg/HgO}} + 0.059 \text{ pH} ; E_{\text{Hg/HgO}} = +0.11 \text{ V}$$

After the CA studies for 1 hour, 2 ml of electrolyte (dissolved with NORR products) was collected and used to identify and quantify the electrochemically synthesized NORR products such as  $\text{NH}_3$ , and  $\text{N}_2\text{H}_4$  by using UV-visible spectroscopy and  $^1\text{H}$  NMR methods. The Zn-NO battery was assembled by using the GDE coated  $\text{Cu}_{75}\text{Ni}_{25}@ \text{NC}$  as cathode and polished Zn plate as anode. The anodic and cathodic compartments are filled with 1M KOH, and an anion exchange membrane (AEM) was used as a separator. Prior to the Zn-NO battery performance evaluation the catholyte was saturated with 99.9% NO, and the flow was maintained through battery operation.

### ***Product Quantification***

#### **Colorimetric Quantification of $\text{NH}_3$ (Indophenol Blue Method)**

The indophenol blue method was used to estimate the  $\text{NH}_3$  yields. 2 mL of aliquot collected after 1 h of electrolysis was mixed with 2 mL of Reagent A (1 M NaOH containing 5 wt % salicylic acid and 5 wt % trisodium citrate dihydrate), 1 mL of Reagent B (0.05 M sodium hypochlorite), and 200  $\mu\text{L}$  of Reagent C (1 wt % sodium nitroprusside) and the result mixture is incubated in dark for 1h. After that, the samples are subjected to the UV-visible spectroscopy to record the absorption spectrum in the wavelength range of 500-800 nm, and the peak absorbance at 655 nm is considered to calculate the ammonia yield. Similarly, the  $\text{NH}_3$  calibration plot was obtained by recording the absorbance values of known ammonium chloride solutions prepared in 1M KOH (Fig. S13).

#### **$^1\text{H}$ NMR Quantification of $\text{NH}_3$**

For quantifying the ammonia through  $^1\text{H}$  NMR, 400  $\mu\text{L}$  of aliquot was mixed with 100  $\mu\text{L}$  of 4 M  $\text{H}_2\text{SO}_4$  and 50  $\mu\text{L}$  of DMSO- $d_6$ . The internal standard 100  $\mu\text{L}$  of Maleic acid (2500  $\mu\text{M}$ ) is added into the above solution mixture. The  $^1\text{H}$  NMR spectrum acquisition with ordinarily pulse sequence (zg30) could not produce any characteristic triplet peaks of ammonia, which could be

due to the dominant proton signals raised from the aqueous solvent. By employing the pulse sequence (zgesgp) with 256 scan acquisition, the solvent peak got suppressed and the clear triplet peaks of ammonia were obtained. The Ammonia was quantified by integrating the triplet peaks with respect to the standard maleic acid peak (6.25  $\delta$ ). The standard  $\text{NH}_3$  calibration plot was obtained by recording  $^1\text{H}$  NMR spectrum of known ammonium chloride solutions prepared in 1M KOH (Fig. S14).

### **Colorimetric Quantification of $\text{N}_2\text{H}_4$ (Watt and Chrisp Method)**

The Watt and Chrisp method is used to identify and quantify the hydrazine side product. Initially, the color reagent was prepared by dissolving 5.99 g of para-(dimethylamino) benzaldehyde in 30 mL of concentrated HCl and 300 mL of ethanol. 2 mL of the aliquot is mixed with 3 mL of DIW and 5 mL color reagent and incubated for 10 min in dark. The UV-visible spectrum of the above solution mixture is recorded in the wavelength range of 420-520 nm and the peak absorbance at a wavelength of 455 nm was considered to calculate the formed hydrazine. Similarly, the  $\text{N}_2\text{H}_4$  calibration plot was obtained by recording the absorbance values of known  $\text{N}_2\text{H}_4$  solutions prepared in 1M KOH (Fig. S15).

## ***Equations used for the estimation of NH<sub>3</sub> yield rates and FE<sub>NH3</sub>***

### *1. Average Ammonia yield rate ( $Y_p$ )*

The average yield rate ( $Y_p$ ) of ammonia produced from electrocatalytic NORR process was calculated by the following equation:

$$\text{Average yield rate } (Y_p) = \frac{(C_{product} \times V)}{A \times t \times M_w}$$

Where  $Y_p$  is the mean rate of NH<sub>3</sub> formation ( $\mu\text{mol cm}^{-2} \text{h}^{-1}$ ),  $C_{product}$  is the concentration of NH<sub>3</sub> formed (estimated by the Indophenol-blue method) after the electrolysis ( $\mu\text{g mL}^{-1}$ ),  $V$  is the total volume of electrolyte in the cathodic compartment (mL),  $A$  is the area of cathode ( $\text{cm}^2$ ),  $t$  is the electrolysis time (h), and  $M_w$  is the molar mass of NH<sub>3</sub> ( $\text{g mol}^{-1}$ ).

### *2. Faradaic Efficiency (FE) of NH<sub>3</sub>*

The Faradaic Efficiency (FE) of ammonia was calculated by the following equation:

$$FE (\%) = \frac{(n \times F \times C_{product} \times V \times 10^{-4})}{M_w \times Q}$$

Where  $n$  is the number of electrons transferred during NORR to NH<sub>3</sub> (5 electrons),  $F$  is the Faraday constant ( $96485 \text{ C mol}^{-1}$ ),  $C_{product}$  concentration of NH<sub>3</sub> formed after the electrolysis ( $\mu\text{g mL}^{-1}$ ),  $V$  is the total volume of electrolyte in the cathodic compartment (mL),  $M_w$  is the molar mass of NH<sub>3</sub> ( $\text{g mol}^{-1}$ ), and  $Q$  is the quantity of charge consumed during the electrolysis (C).

**Table S1** Rietveld refinement parameters of the all the electrocatalysts.

|                                                             |             |                 |          |          |          |             |
|-------------------------------------------------------------|-------------|-----------------|----------|----------|----------|-------------|
| <b>Cu<sub>100</sub>@NC</b><br>$\chi^2 = 2.24$               | <b>Name</b> | <b>Type</b>     | <b>x</b> | <b>y</b> | <b>z</b> | <b>frac</b> |
| 0                                                           | Cu1         | Cu <sup>0</sup> | 0.00000  | 0.00000  | 0.00000  | 0.2000      |
| 1                                                           | Cu2         | Cu <sup>0</sup> | 0.00000  | 0.00000  | 0.00000  | 0.8000      |
| <b>Cu<sub>75</sub>Ni<sub>25</sub>@NC</b><br>$\chi^2 = 2.10$ | <b>Name</b> | <b>Type</b>     | <b>x</b> | <b>y</b> | <b>z</b> | <b>frac</b> |
| 0                                                           | Ni1         | Ni <sup>0</sup> | 0.00000  | 0.00000  | 0.00000  | 0.2500      |
| 1                                                           | Cu1         | Cu <sup>0</sup> | 0.00000  | 0.00000  | 0.00000  | 0.7500      |
| <b>Cu<sub>50</sub>Ni<sub>50</sub>@NC</b><br>$\chi^2 = 1.76$ | <b>Name</b> | <b>Type</b>     | <b>x</b> | <b>y</b> | <b>z</b> | <b>frac</b> |
| 0                                                           | Ni1         | Ni <sup>0</sup> | 0.00000  | 0.00000  | 0.00000  | 0.5000      |
| 1                                                           | Cu1         | Cu <sup>0</sup> | 0.00000  | 0.00000  | 0.00000  | 0.5000      |
| <b>Cu<sub>25</sub>Ni<sub>75</sub>@NC</b><br>$\chi^2 = 2.22$ | <b>Name</b> | <b>Type</b>     | <b>x</b> | <b>y</b> | <b>z</b> | <b>frac</b> |
| 0                                                           | Ni1         | Ni <sup>0</sup> | 0.00000  | 0.00000  | 0.00000  | 0.7500      |
| 1                                                           | Cu1         | Cu <sup>0</sup> | 0.00000  | 0.00000  | 0.00000  | 0.2500      |
| <b>Ni<sub>100</sub>@NC</b><br>$\chi^2 = 2.10$               | <b>Name</b> | <b>Type</b>     | <b>x</b> | <b>y</b> | <b>z</b> | <b>frac</b> |
| 0                                                           | Ni1         | Ni <sup>0</sup> | 0.00000  | 0.00000  | 0.00000  | 0.5000      |
| 1                                                           | Ni2         | Ni <sup>0</sup> | 0.00000  | 0.00000  | 0.00000  | 0.5000      |

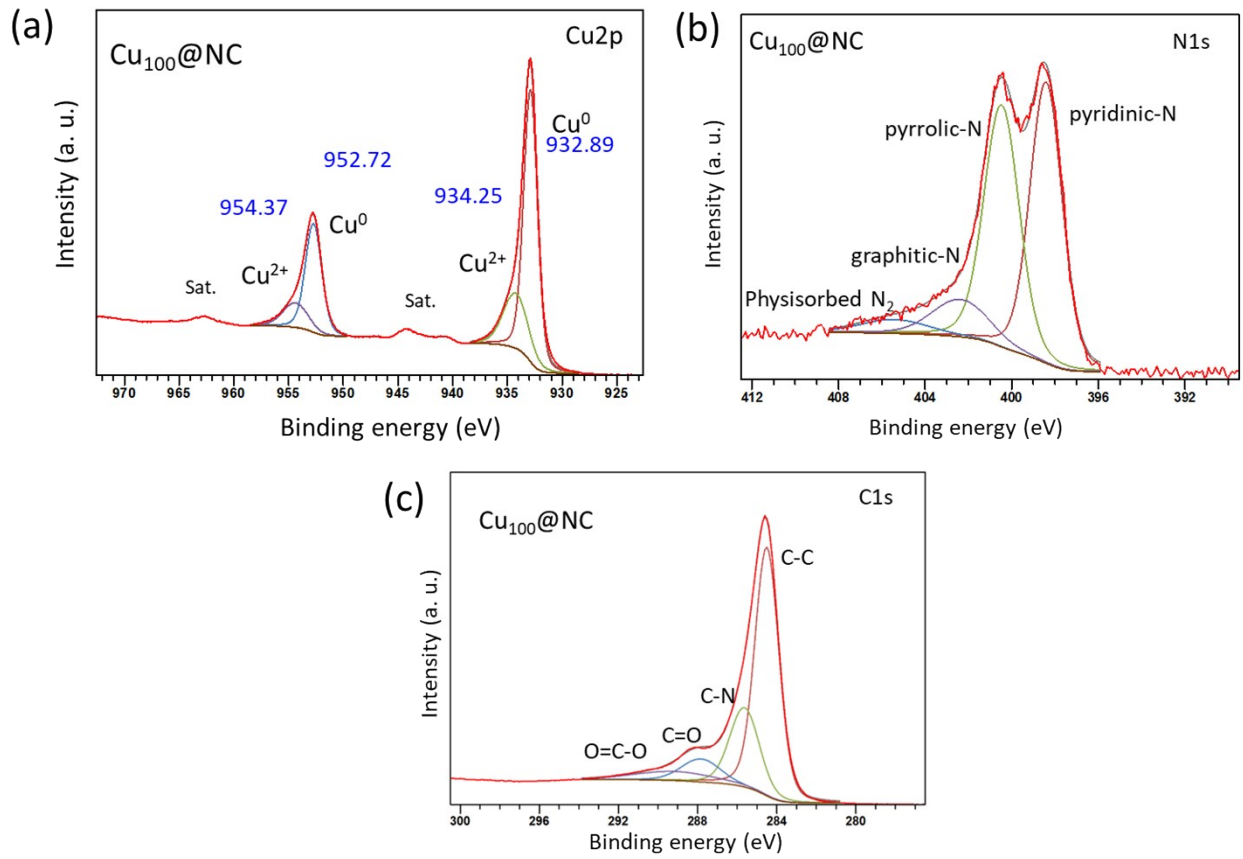

**Fig. S1** Deconvoluted XPS spectra of (a) Cu2p, (b) N1s, and (c) C1s of Cu<sub>100</sub>@NC.

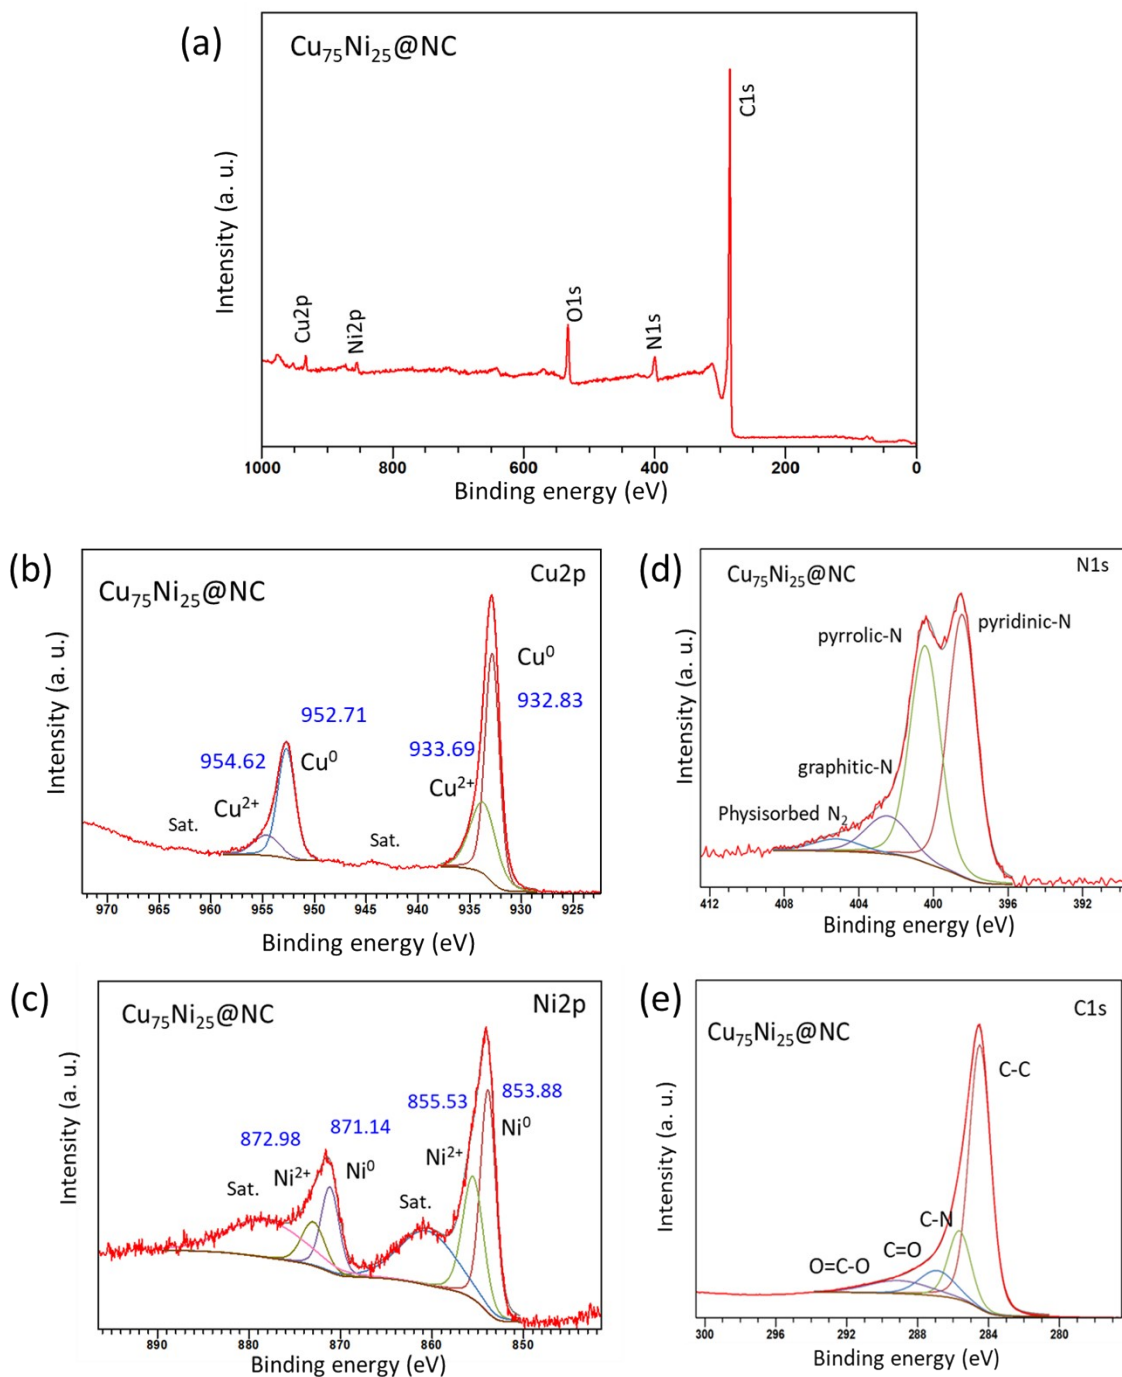

**Fig. S2** (a) XPS survey scan of  $\text{Cu}_{75}\text{Ni}_{25}@NC$ . The deconvoluted XPS spectra of (b) Cu2p, (c) Ni2p, (d) N1s, and (e) C1s of  $\text{Cu}_{75}\text{Ni}_{25}@NC$ .



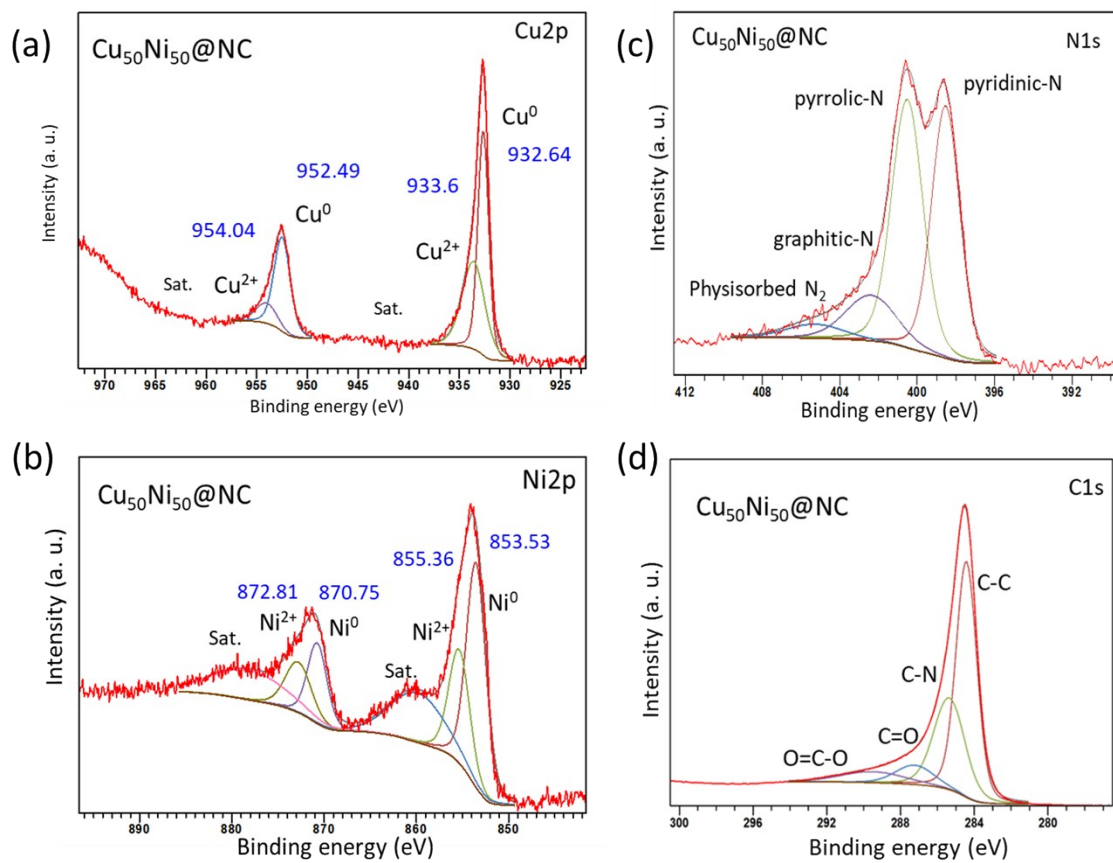

**Fig. S3** Deconvoluted XPS spectra of (a) Cu2p, (b) Ni2p, (c) N1s, and (d) C1s of Cu<sub>50</sub>Ni<sub>50</sub>@NC.

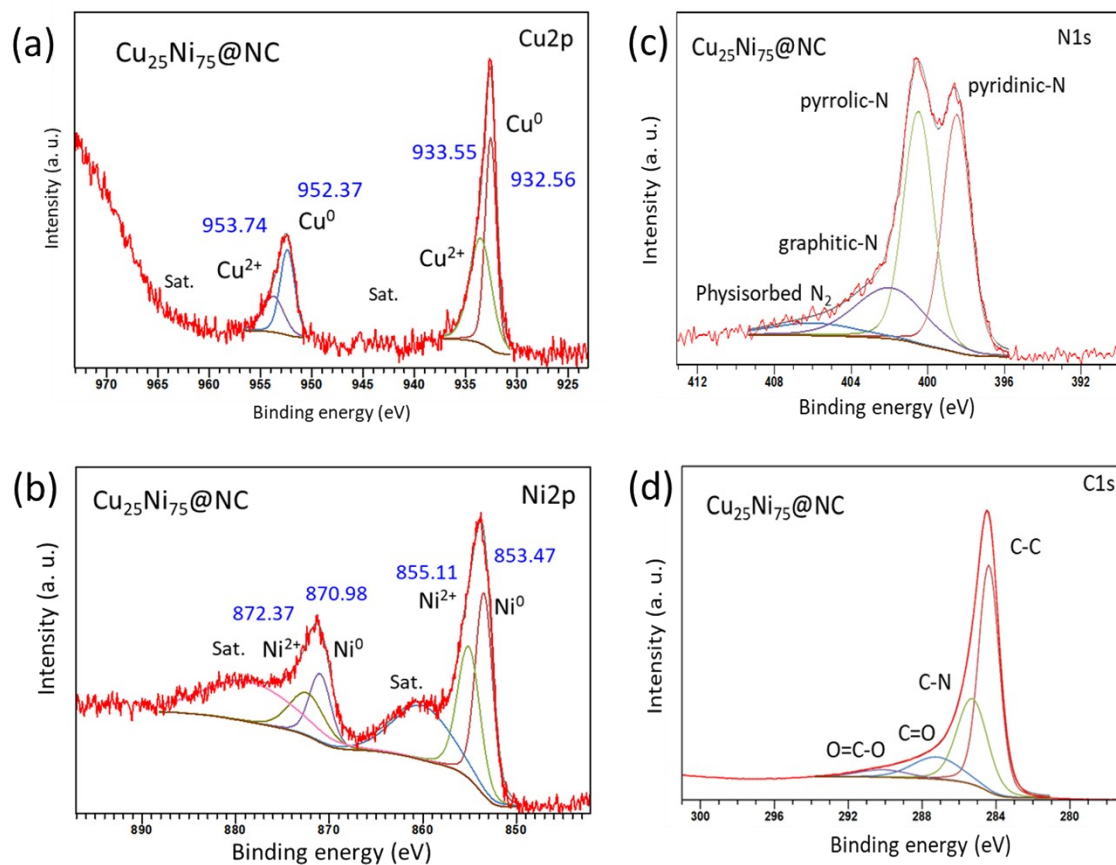

**Fig. S4** Deconvoluted XPS spectra of (a) Cu2p, (b) Ni2p, (c) N1s, and (d) C1s of Cu<sub>25</sub>Ni<sub>75</sub>@NC.

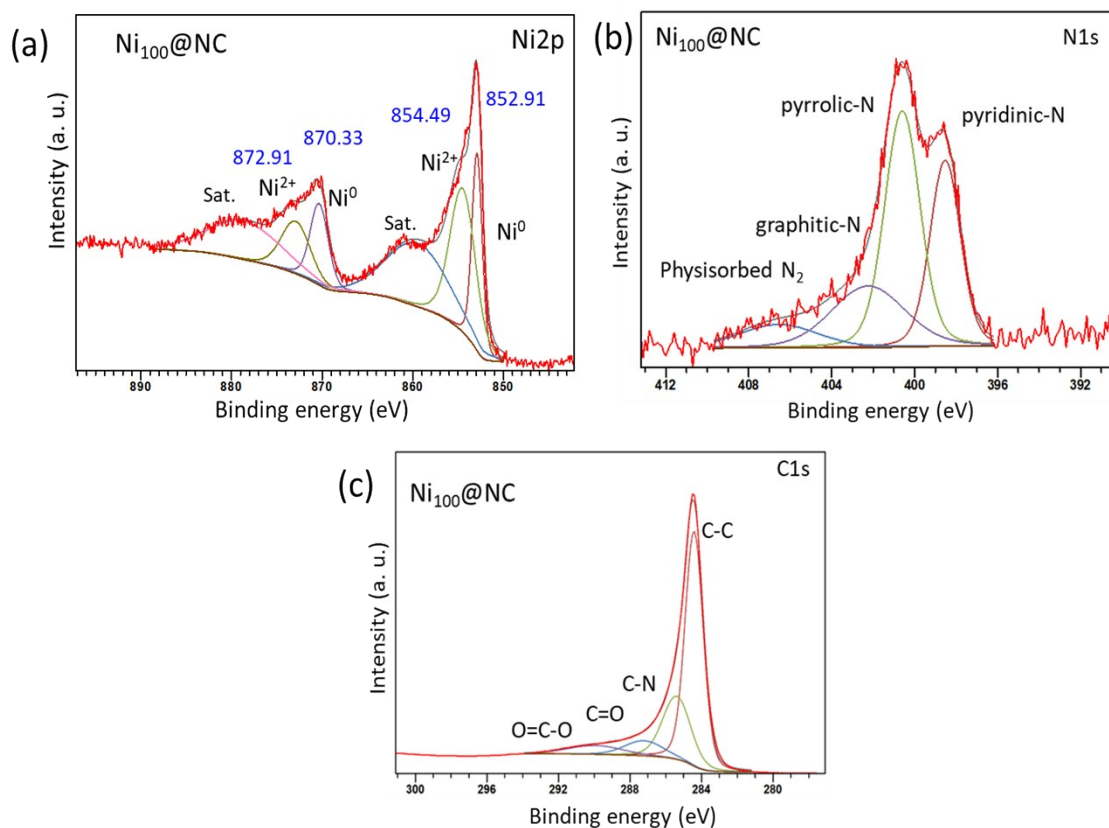

**Fig. S5** Deconvoluted XPS spectra of (a) Ni<sub>2p</sub>, (b) N<sub>1s</sub>, and (c) C<sub>1s</sub> of Ni<sub>100</sub>@NC.

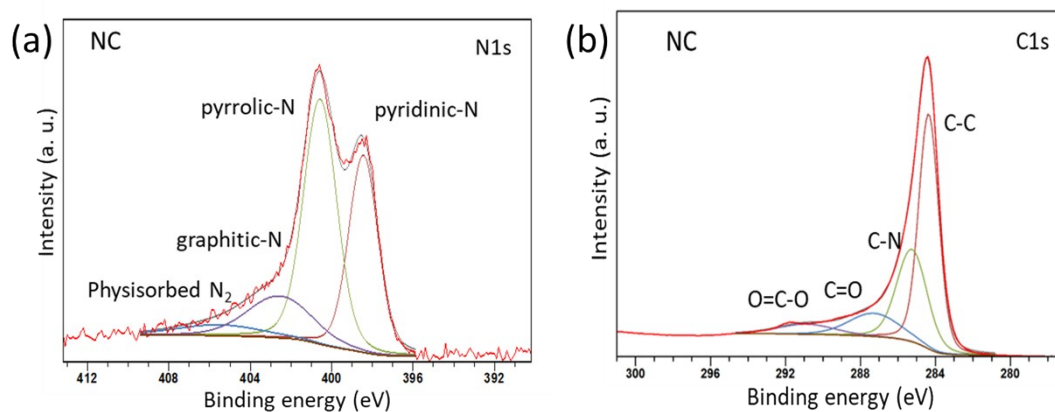

**Fig. S6** Deconvoluted XPS spectra of (a) N<sub>1s</sub>, and (b) C<sub>1s</sub> of NC.

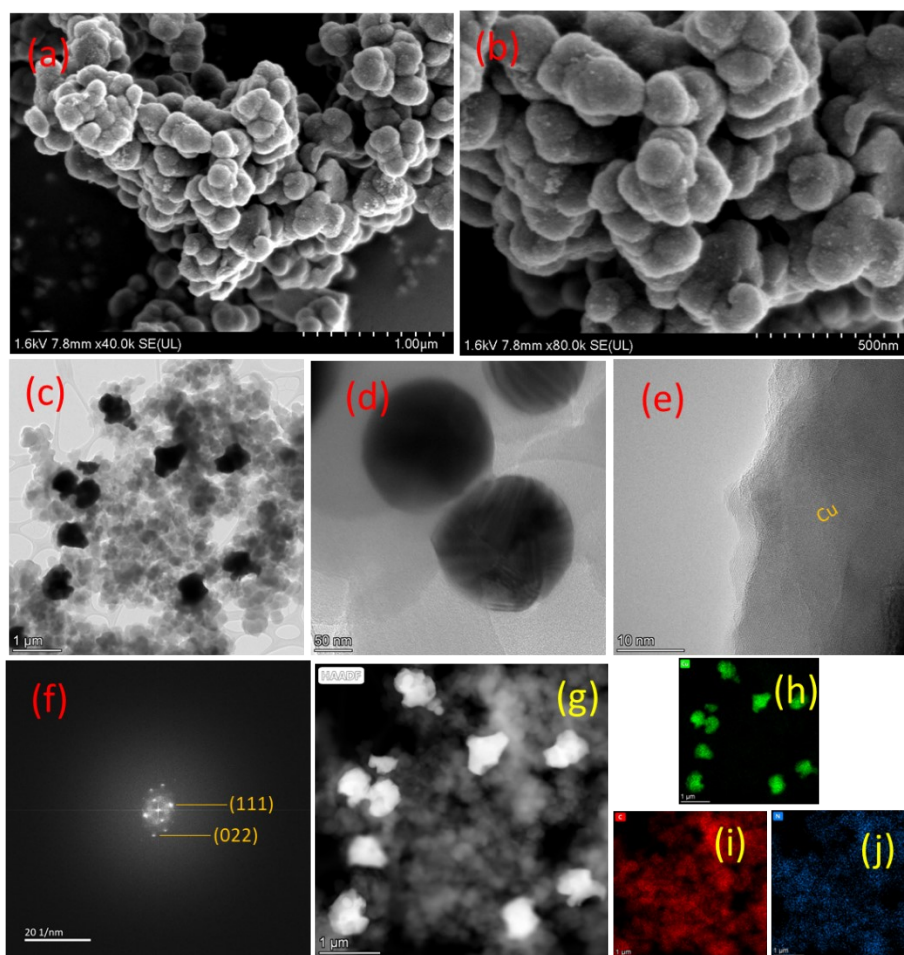

**Fig. S7** (a-b) FESEM, (c-d) TEM images of  $\text{Cu}_{100}@\text{NC}$ . (e) HRTEM image and (f) the corresponding FFT pattern of  $\text{Cu}_{100}@\text{NC}$ . (g) HAADF image and (h-j) elemental mapping of  $\text{Cu}_{100}@\text{NC}$ .

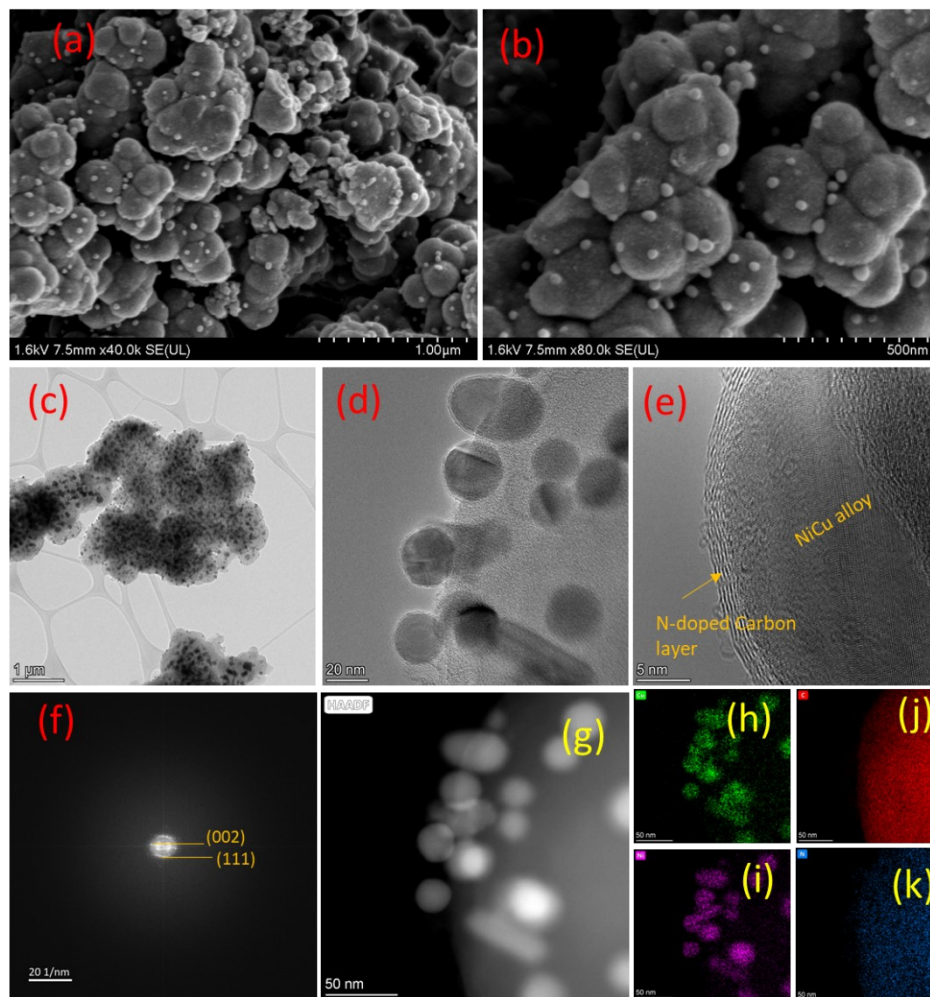

**Fig. S8** (a-b) FESEM, (c-d) TEM images of  $\text{Cu}_{50}\text{Ni}_{50}@NC$ . (e) HRTEM image and (f) the corresponding FFT pattern of  $\text{Cu}_{50}\text{Ni}_{50}@NC$ . (g) HAADF image and (h-k) elemental mapping of  $\text{Cu}_{50}\text{Ni}_{50}@NC$ .



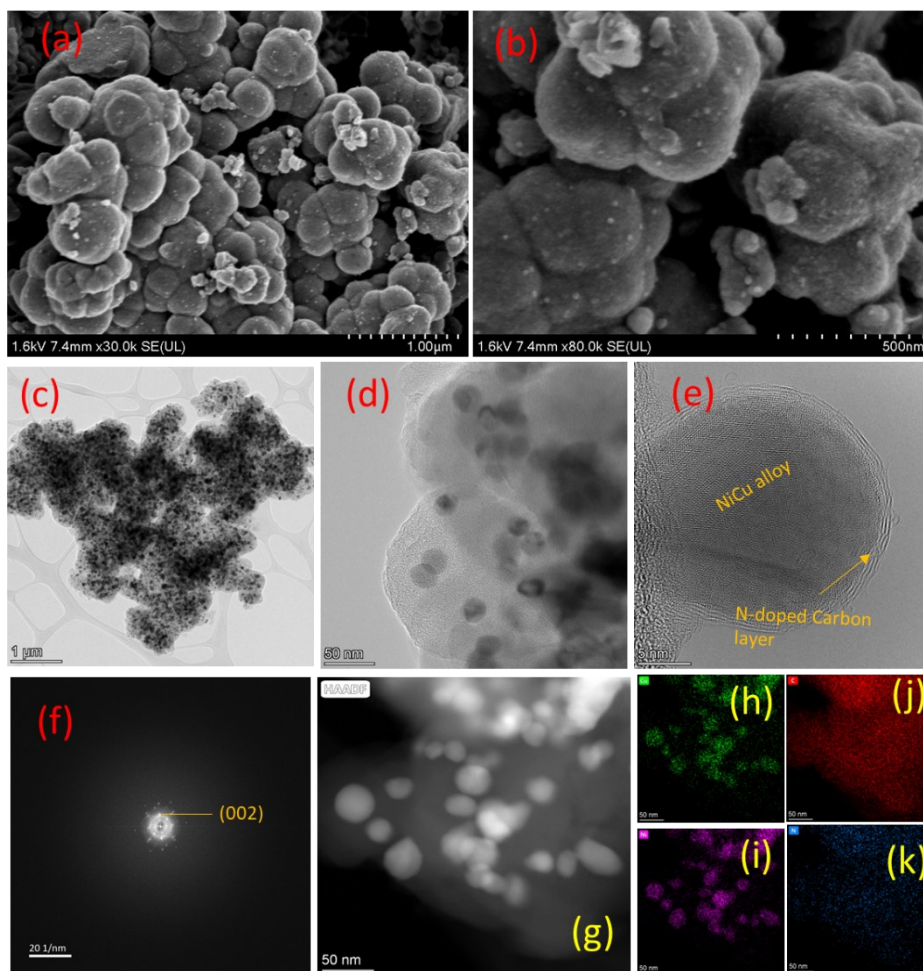

**Fig. S9** (a-b) FESEM, (c-d) TEM images of  $\text{Cu}_{25}\text{Ni}_{75}@NC$ . (e) HRTEM image and (f) the corresponding FFT pattern of  $\text{Cu}_{25}\text{Ni}_{75}@NC$ . (g) HAADF image and (h-k) elemental mapping of  $\text{Cu}_{25}\text{Ni}_{75}@NC$ .

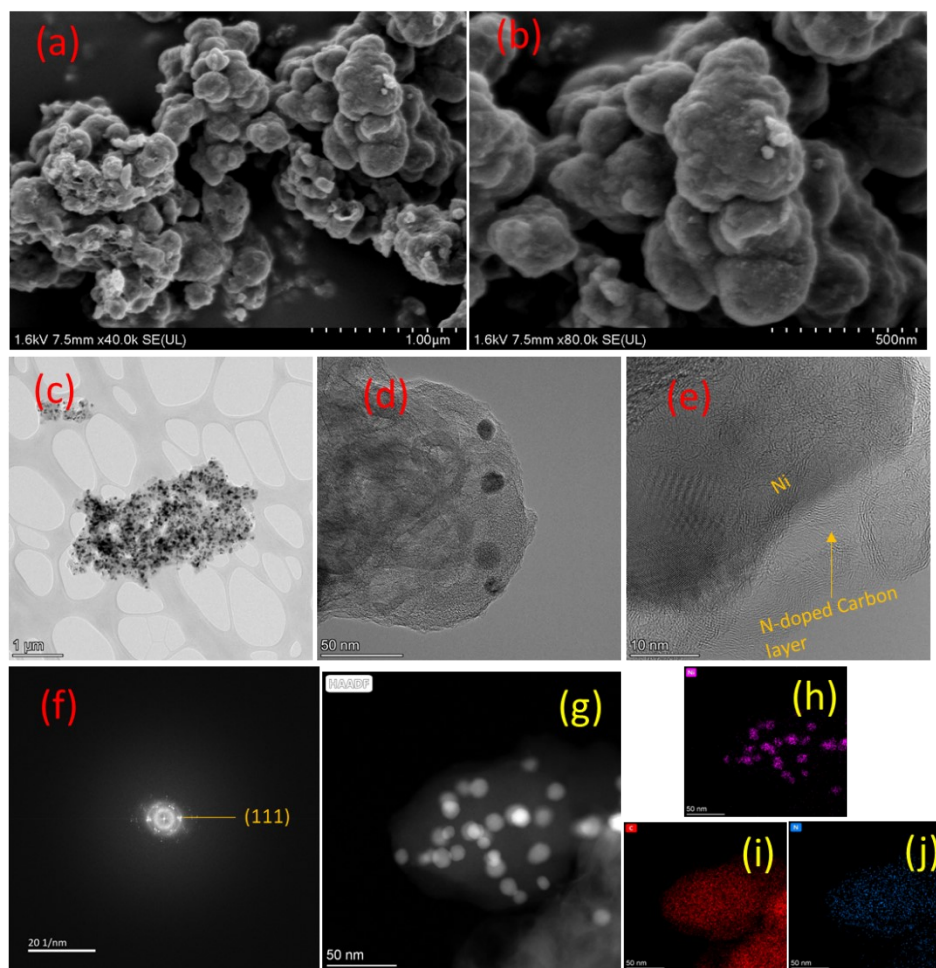

**Fig. S10** (a-b) FESEM, (c-d) TEM images of Ni<sub>100</sub>@NC. (e) HRTEM image and (f) the corresponding FFT pattern of Ni<sub>100</sub>@NC. (g) HAADF image and (h-j) elemental mapping of Ni<sub>100</sub>@NC.

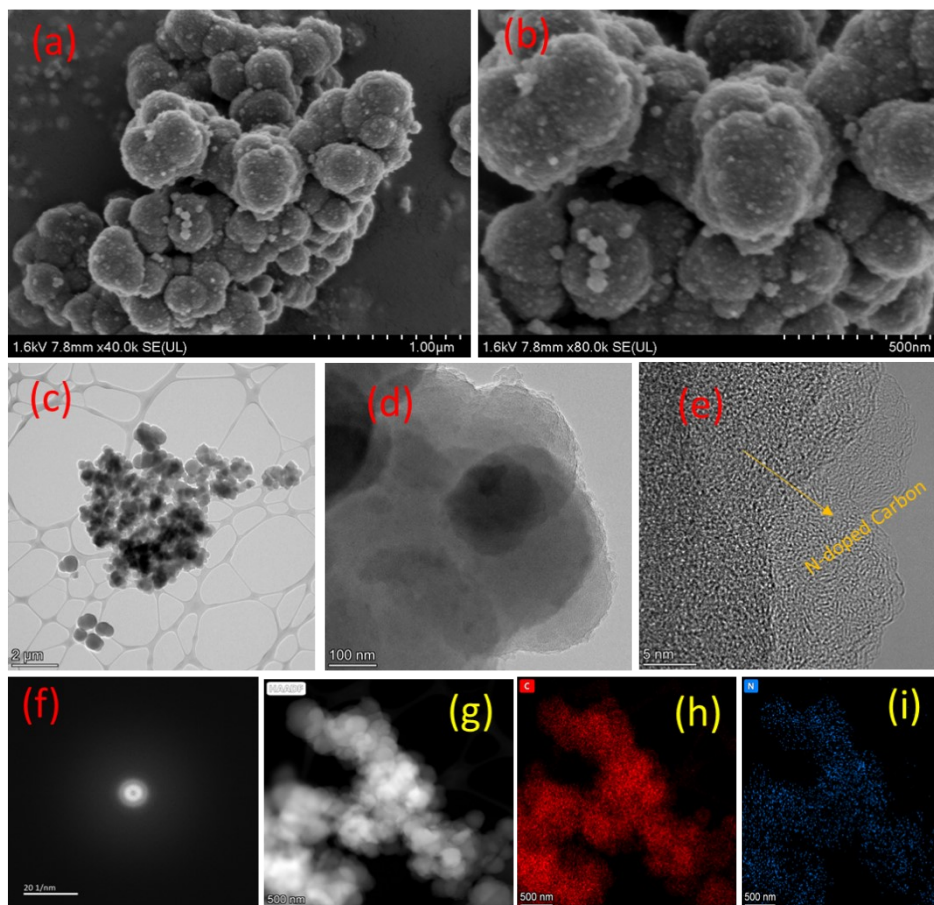

**Fig. S11** (a-b) FESEM, (c-d) TEM images of NC. (e) HRTEM image and (f) the corresponding FFT pattern of NC. (g) HAADF image and (h-i) elemental mapping of NC.



**Table S2** ICP-OES data of the nanoalloy catalysts.

| Sample                                | Cu (ppm) | Ni (ppm) | Cu (mM) | Ni (mM) | Cu: Ni ratio |
|---------------------------------------|----------|----------|---------|---------|--------------|
| Cu <sub>75</sub> Ni <sub>25</sub> @NC | 0.139    | 0.027    | 0.0021  | 0.00046 | 4.5: 1       |
| Cu <sub>50</sub> Ni <sub>50</sub> @NC | 0.18     | 0.195    | 0.0028  | 0.0033  | 0.85: 1      |
| Cu <sub>25</sub> Ni <sub>75</sub> @NC | 0.179    | 0.475    | 0.0028  | 0.0080  | 1: 2.9       |

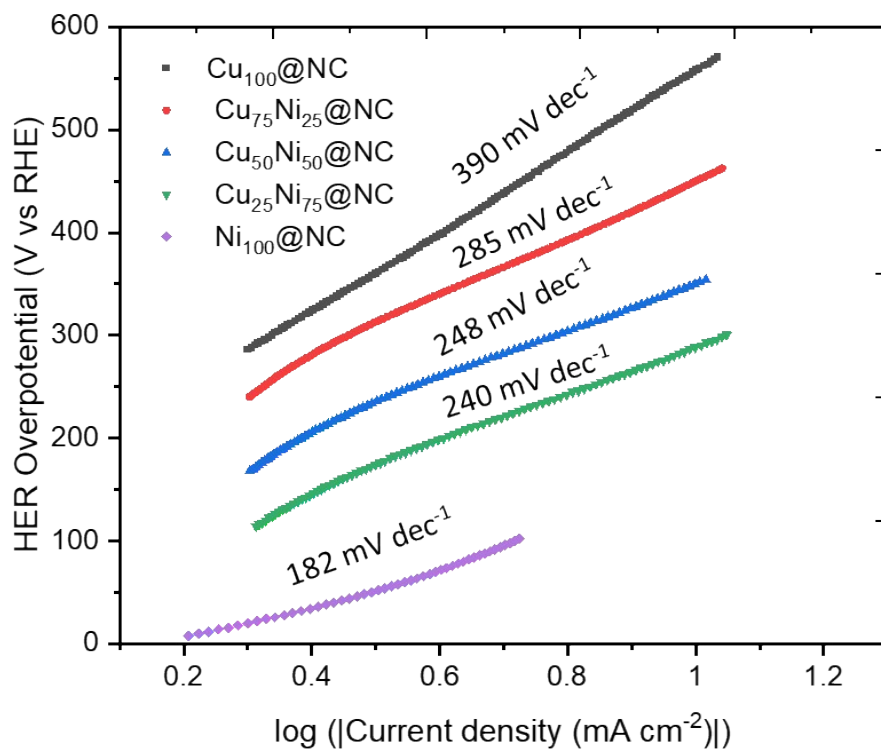

**Fig. S12** Tafels plot for all the electrocatalysts.

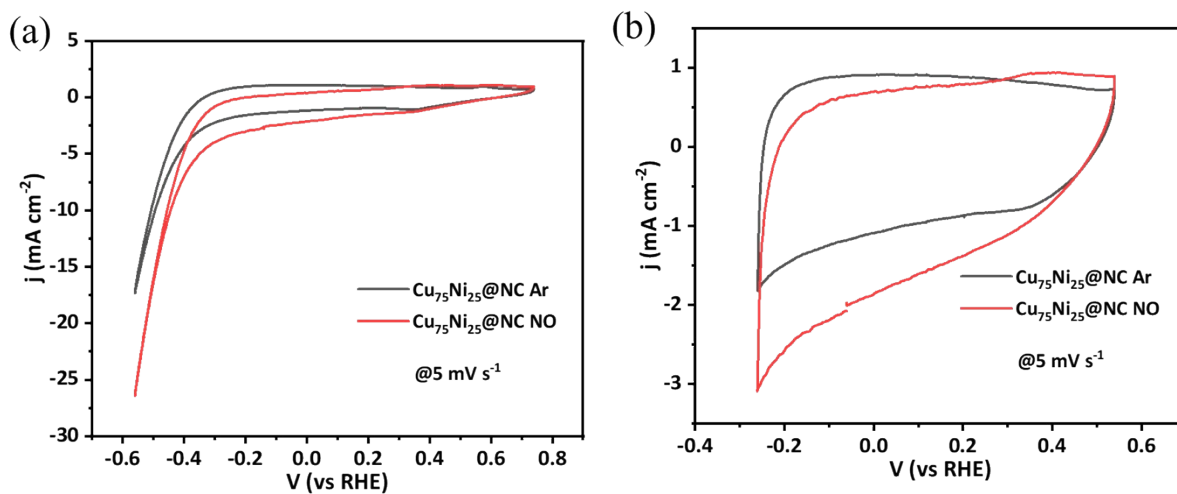

**Fig. S13** (a-b) The cyclic voltammograms (CV) of the Cu<sub>75</sub>Ni<sub>25</sub>@NC near HER region in Ar and NO-saturated electrolyte.

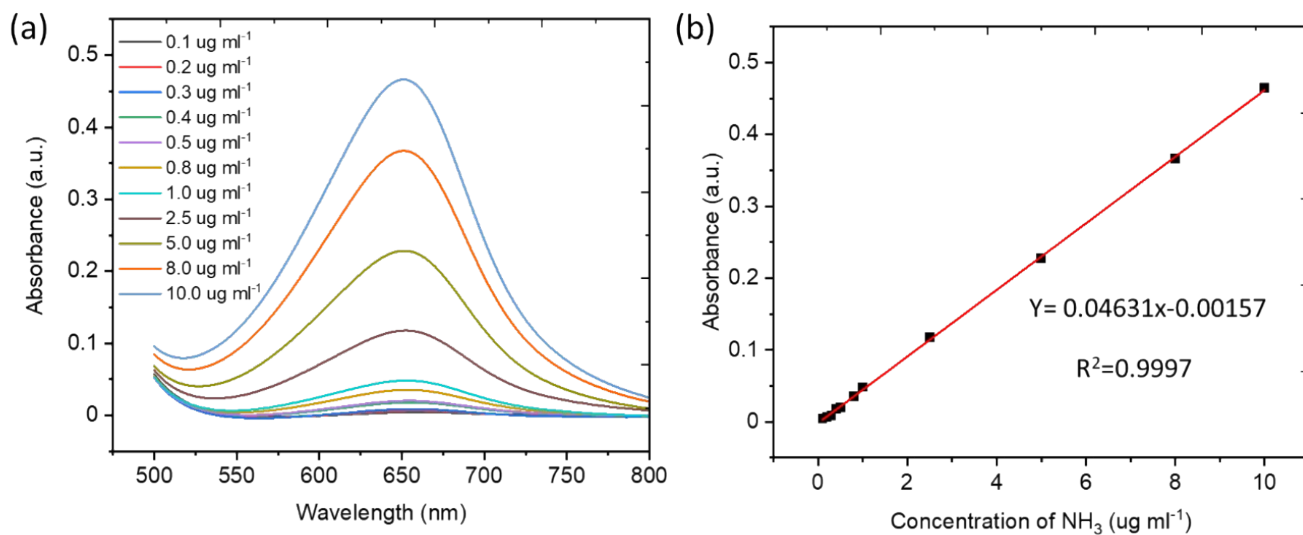

**Fig. S14** NH<sub>3</sub> standard calibration plots using Indophenol blue method. (a) UV-visible spectra and (b) Calibration curve of standard NH<sub>3</sub> concentrations.

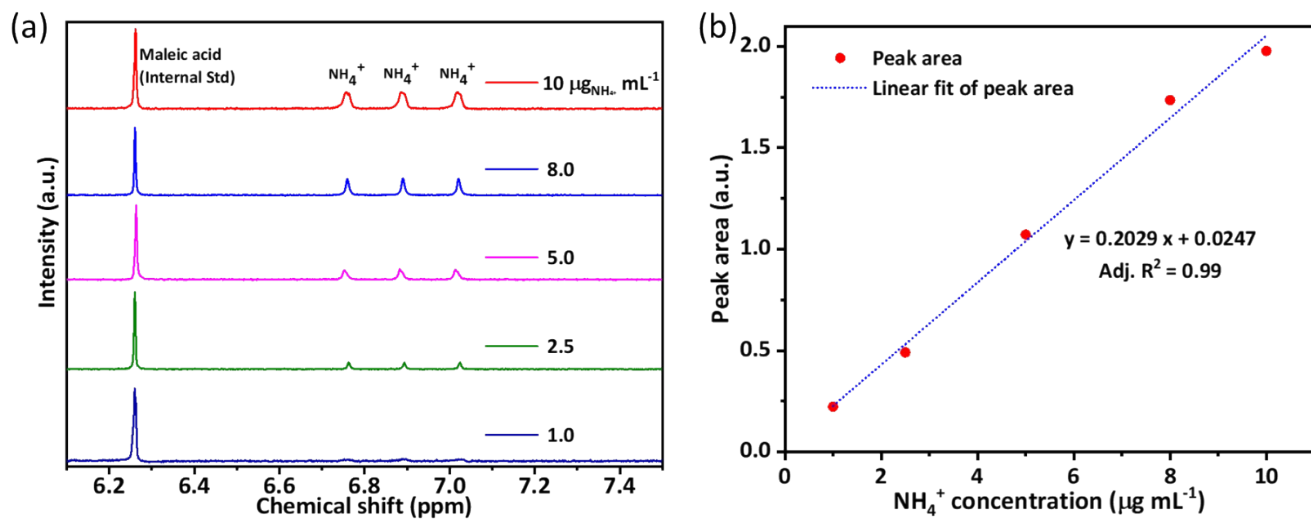

**Fig. S15**  $^1\text{H}$  NMR standard calibration plots for  $\text{NH}_3$  (a)  $^1\text{H}$  NMR spectra and (b) Calibration curve of standard  $\text{NH}_3$  concentrations.

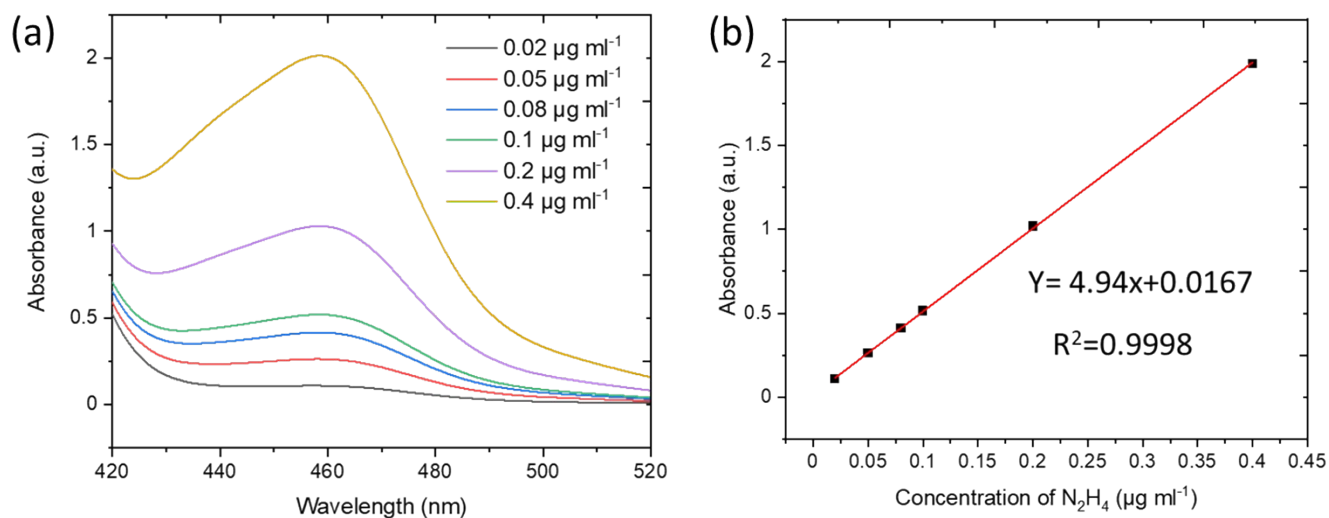

**Fig. S16**  $\text{N}_2\text{H}_4$  standard calibration plots using Watt and Chrisp Method. (a) UV-visible spectra and (b) Calibration curve of standard  $\text{N}_2\text{H}_4$  concentrations.

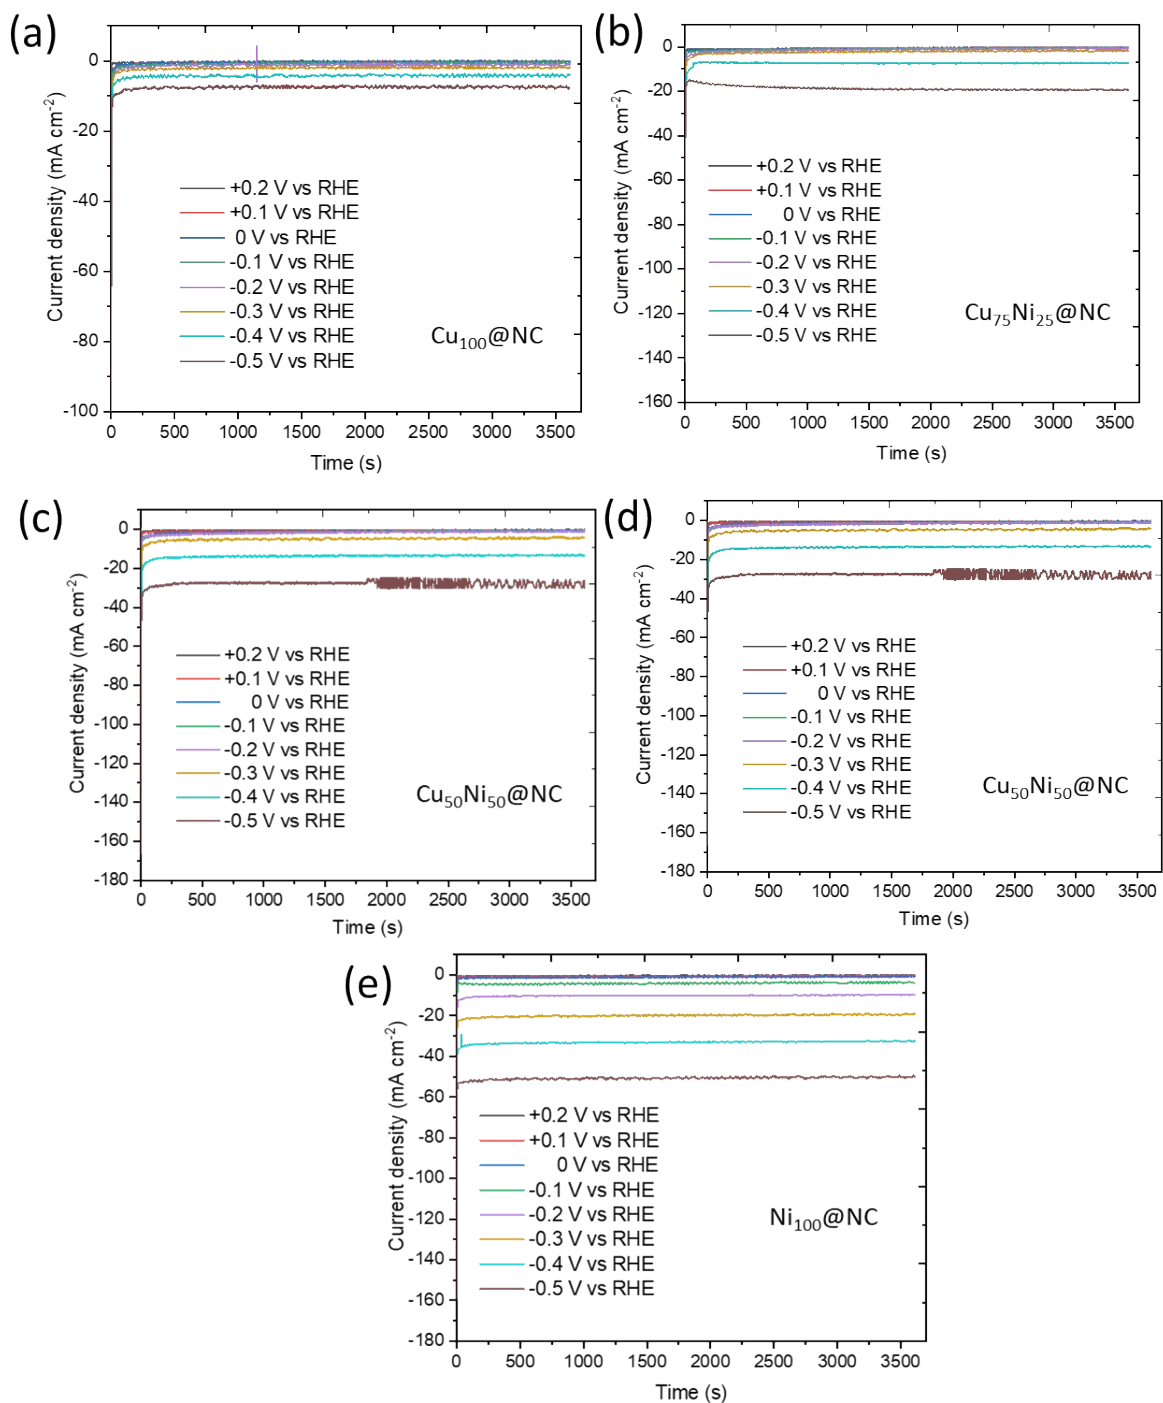

**Fig. S17** CA studies (NO medium) of (a)  $\text{Cu}_{100}@NC$ , (b)  $\text{Cu}_{75}\text{Ni}_{25}@NC$ , (c)  $\text{Cu}_{50}\text{Ni}_{50}@NC$ , (d)  $\text{Cu}_{25}\text{Ni}_{75}@NC$ , and (e)  $\text{Ni}_{100}@NC$  at various potentials.

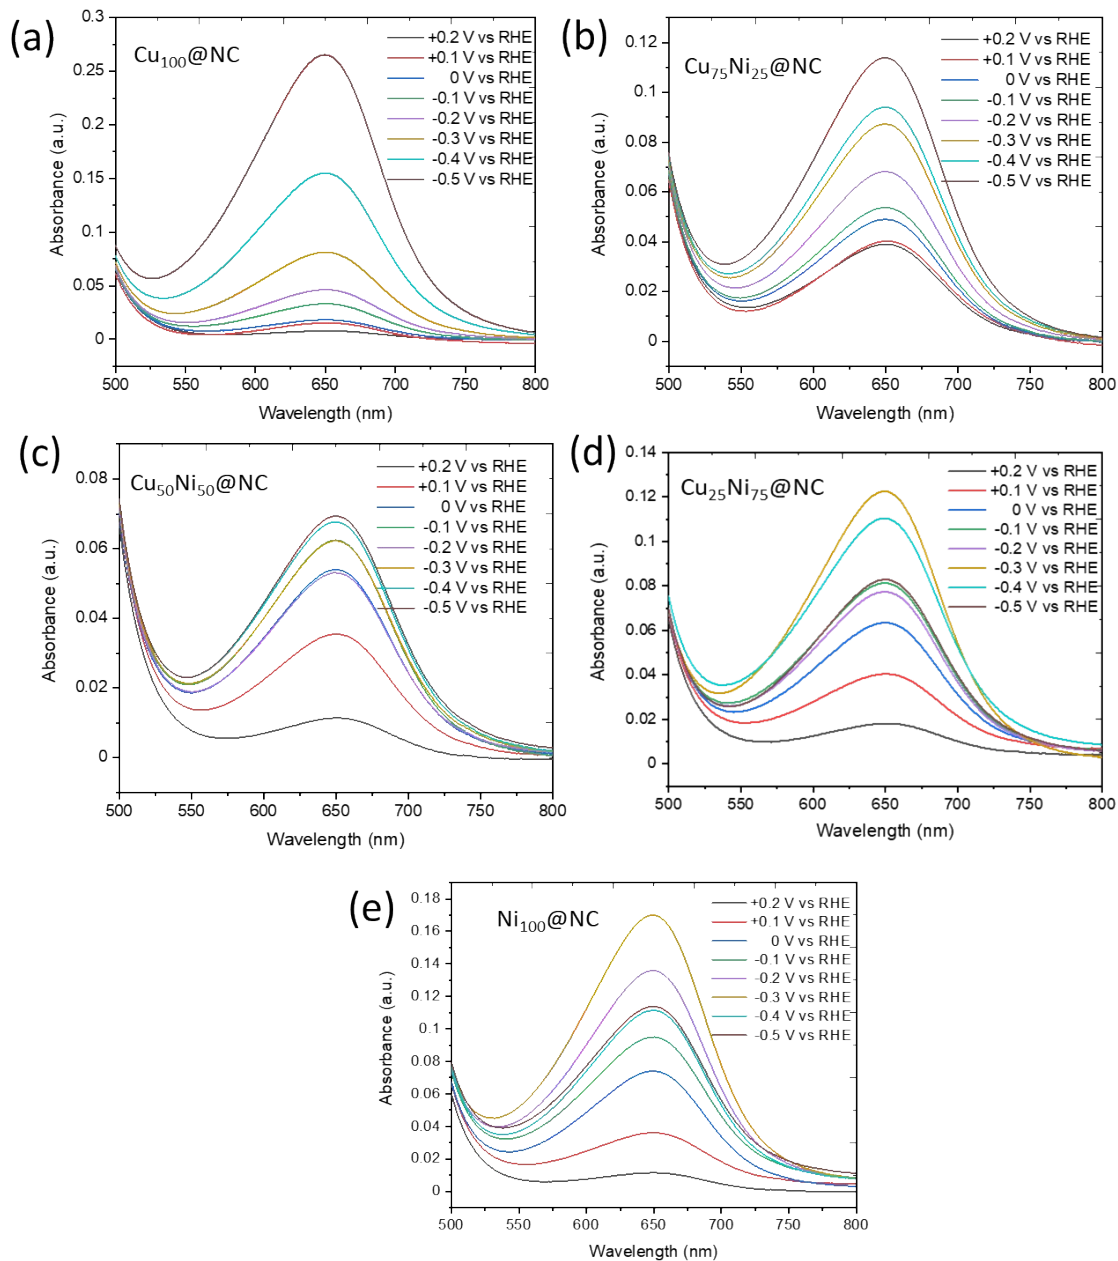

**Fig. S18** UV-visible spectra of aliquots collected after 1 h electrolysis of (a)  $\text{Cu}_{100}\text{@NC}$ , (b)  $\text{Cu}_{75}\text{Ni}_{25}\text{@NC}$ , (c)  $\text{Cu}_{50}\text{Ni}_{50}\text{@NC}$ , (d)  $\text{Cu}_{25}\text{Ni}_{75}\text{@NC}$ , and (e)  $\text{Ni}_{100}\text{@NC}$  at various potentials.

**Table S3** Summary of the NORR performance of the electrocatalysts in 1M KOH at +0.1 V vs RHE.

| Sample                                | NH <sub>3</sub> yield rate<br>( $\mu\text{mol cm}^{-2} \text{h}^{-1}$ ) | FE <sub>NH<sub>3</sub></sub> (%) |
|---------------------------------------|-------------------------------------------------------------------------|----------------------------------|
| Cu <sub>100</sub> @NC                 | 0.74                                                                    | 41.83                            |
| Cu <sub>75</sub> Ni <sub>25</sub> @NC | 3.6                                                                     | 79.33                            |
| Cu <sub>50</sub> Ni <sub>50</sub> @NC | 3.55                                                                    | 65.29                            |
| Cu <sub>25</sub> Ni <sub>75</sub> @NC | 3.58                                                                    | 62.98                            |
| Ni <sub>100</sub> @NC                 | 3.02                                                                    | 52.3                             |

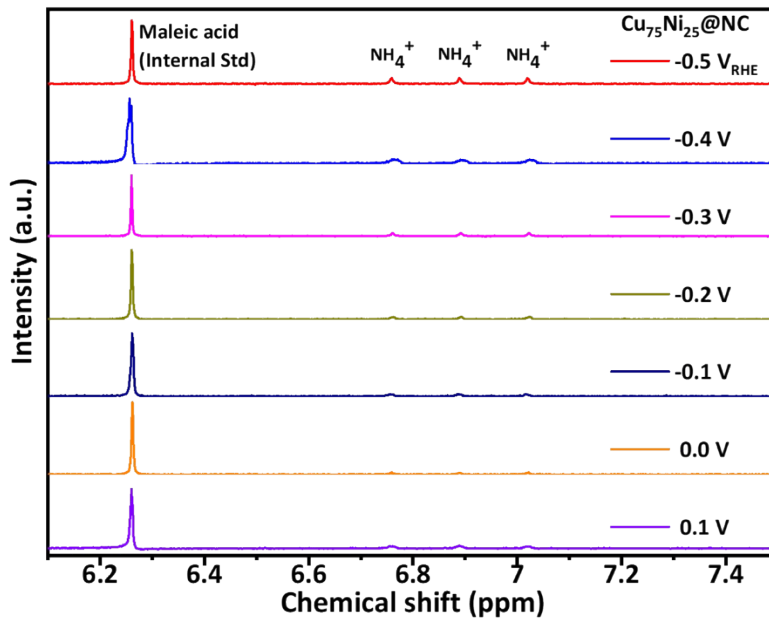

**Fig. S19** <sup>1</sup>H NMR spectra of the aliquots collected after 1 h electrolysis of Cu<sub>75</sub>Ni<sub>25</sub>@NC at various potentials.

**Table S4** Comparison of NH<sub>3</sub> yield rates and FE<sub>NH<sub>3</sub></sub> of Cu<sub>75</sub>Ni<sub>25</sub>@NC catalyst with the reported transition metal catalysts for NORR.

| Catalysts                                | Electrolyte                            | FE <sub>NH<sub>3</sub></sub><br>(%) | NH <sub>3</sub> yield rate                     | Potential<br>(V vs.<br>RHE) | Ref.                                                     |
|------------------------------------------|----------------------------------------|-------------------------------------|------------------------------------------------|-----------------------------|----------------------------------------------------------|
| Cu foam                                  | 0.25 M Li <sub>2</sub> SO <sub>4</sub> | 93.5                                | 517.1 μmol cm <sup>-2</sup> h <sup>-1</sup>    | -0.9 V                      | <i>Angew. Chem. Int. Ed.</i> 2020, <b>59</b> , 9711-9718 |
| hcp-Co                                   | 0.1 M Na <sub>2</sub> SO <sub>4</sub>  | 72.58                               | 439.50 μmol cm <sup>-2</sup> h <sup>-1</sup>   | -0.6 V                      | <i>J. Am. Chem. Soc.</i> 2023, <b>145</b> , 6899-6904    |
| Ru <sub>0.05</sub> Cu <sub>0.95</sub>    | 0.1 M Na <sub>2</sub> SO <sub>4</sub>  | 64.9                                | 17.68 μmol cm <sup>-2</sup> h <sup>-1</sup>    | -0.5 V                      | <i>Sci. China. Chem.</i> 2021, <b>64</b> , 1493-1497     |
| Cu-Ti                                    | 0.05 M Na <sub>2</sub> SO <sub>4</sub> | 90                                  | 400 μmol cm <sup>-2</sup> h <sup>-1</sup>      | -0.6 V                      | <i>ChemElectroChem.</i> 2022, <b>9</b> , e202101273      |
| Ru-LCN                                   | 0.5 M Na <sub>2</sub> SO <sub>4</sub>  | 65.96                               | 45.02 μmol cm <sup>-2</sup> h <sup>-1</sup>    | -0.2 V                      | <i>ACS Energy Lett.</i> 2022, <b>7</b> , 1187-1194       |
| Cu@Co                                    | 0.1 M Na <sub>2</sub> SO <sub>4</sub>  | 76.54                               | 36.89 μmol cm <sup>-2</sup> h <sup>-1</sup>    | -0.5 V                      | <i>Adv. Mater.</i> 2023, 2309470                         |
| CuFe DS/NC                               | 0.1 M Na <sub>2</sub> SO <sub>4</sub>  | 90                                  | 112.52 μmol cm <sup>-2</sup> h <sup>-1</sup>   | -0.6 V                      | <i>Adv. Mater.</i> 2023, <b>35</b> , 2304646             |
| NiNC@CF                                  | 0.5 M PBS                              | 87                                  | 94 μmol cm <sup>-2</sup> h <sup>-1</sup>       | -0.5 V                      | <i>J. Mater. Chem. A</i> 2022, <b>10</b> , 6470          |
| Fe/C                                     | 0.5 M PBS                              | 77                                  | 908 μmol cm <sup>-2</sup> h <sup>-1</sup>      | -0.6 V                      | <i>ACS Energy Lett.</i> 2022, <b>7</b> , 958.            |
| Ni@NC                                    | 0.1 M HCl                              | 72.3                                | 34.6 μmol cm <sup>-2</sup> h <sup>-1</sup>     | 0.16 V                      | <i>Adv. Sci.</i> 2022, <b>9</b> , 2201410                |
| CoNi <sub>(5:5)</sub> O <sub>x</sub> @Cu | 1 M KOH                                | 100                                 | 20 mg h <sup>-1</sup> cm <sup>-2</sup>         | -0.68                       | <i>Adv. Energy Mater.</i> 2023, <b>13</b> , 2204231.     |
| <b>Cu<sub>75</sub>Ni<sub>25</sub>@NC</b> | <b>1 M KOH</b>                         | <b>79</b>                           | <b>3.6 μmol h<sup>-1</sup> cm<sup>-2</sup></b> | <b>0.1 V</b>                | <b>This work</b>                                         |

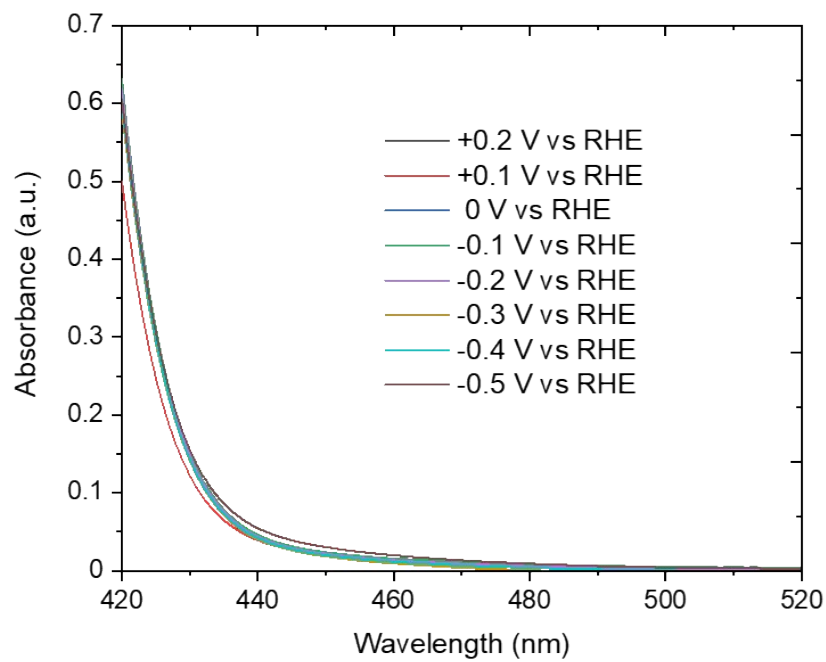

**Fig. S20** UV-visible spectra of aliquots collected after 1 h electrolysis of Cu<sub>75</sub>Ni<sub>25</sub>@NC at various potentials for N<sub>2</sub>H<sub>4</sub> detection.



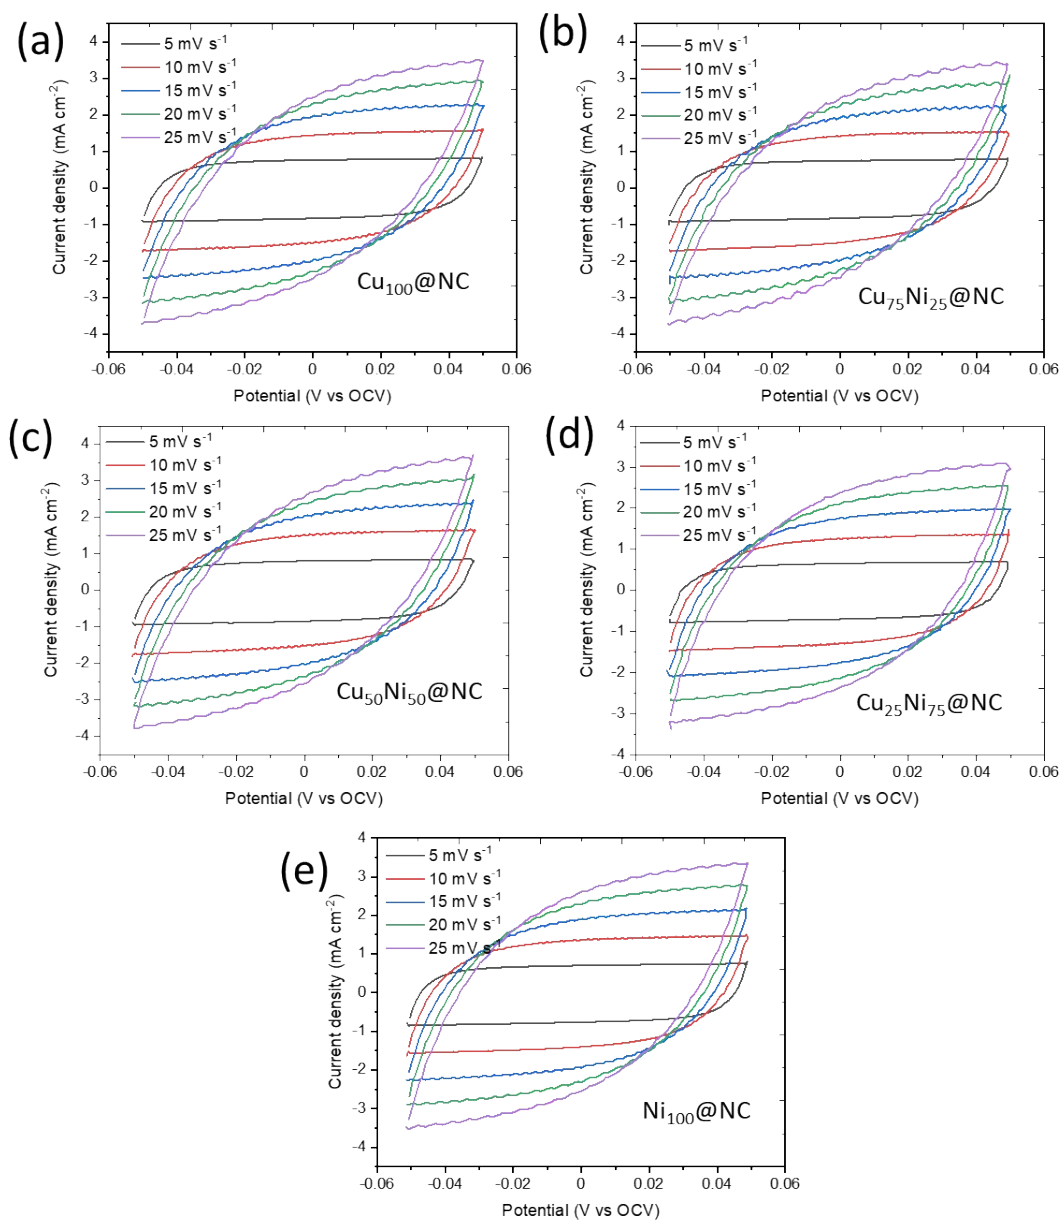

**Fig. S21** The cyclic voltammograms of (a)  $\text{Cu}_{100}\text{@NC}$ , (b)  $\text{Cu}_{75}\text{Ni}_{25}\text{@NC}$ , (c)  $\text{Cu}_{50}\text{Ni}_{50}\text{@NC}$ , (d)  $\text{Cu}_{25}\text{Ni}_{75}\text{@NC}$ , and (e)  $\text{Ni}_{100}\text{@NC}$  at different scan rates.

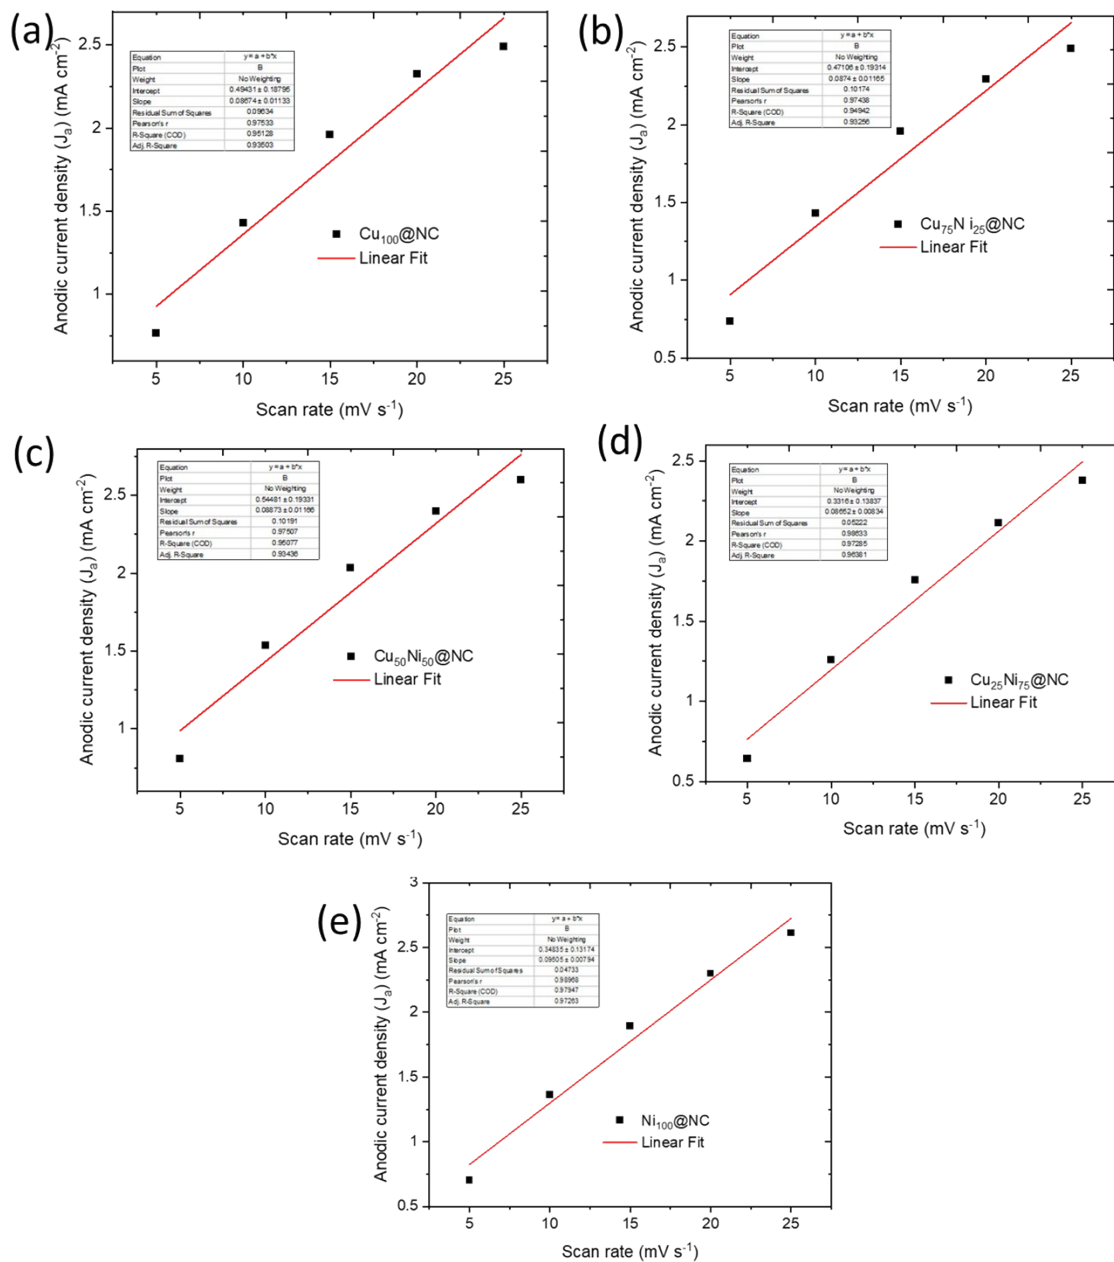

**Fig. S22** The anodic current density vs scan rate plots for the estimation of double layer capacitance ( $C_{dl}$ ) of (a)  $\text{Cu}_{100}\text{@NC}$ , (b)  $\text{Cu}_{75}\text{Ni}_{25}\text{@NC}$ , (c)  $\text{Cu}_{50}\text{Ni}_{50}\text{@NC}$ , (d)  $\text{Cu}_{25}\text{Ni}_{75}\text{@NC}$ , and (e)  $\text{Ni}_{100}\text{@NC}$ .

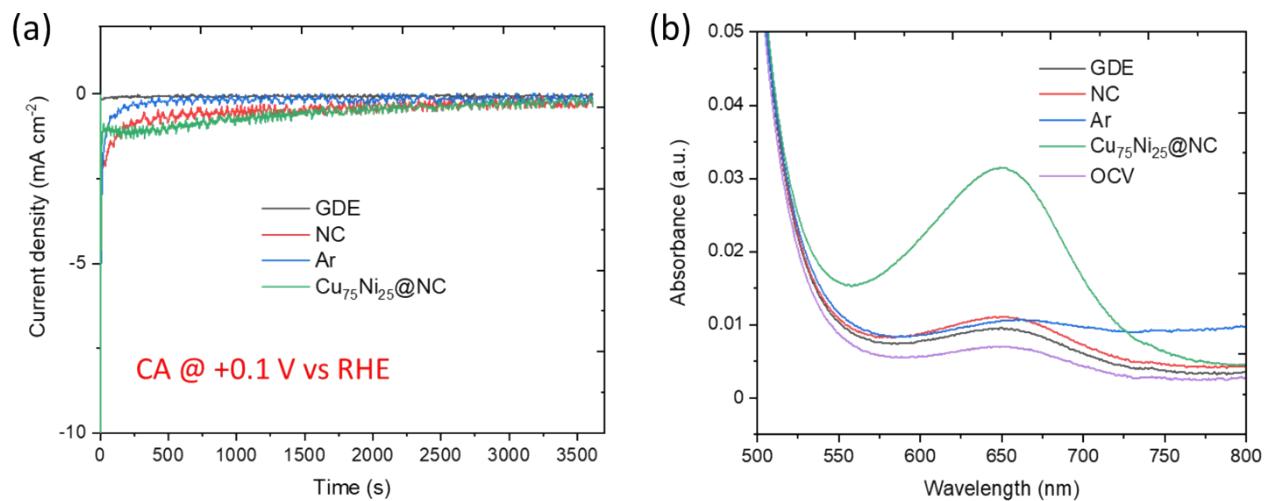

**Fig. S23** (a) CA curves of various controlled experiments performed at +0.1 V vs. RHE, and (b) The corresponding UV-visible spectra for NH<sub>3</sub> detection.

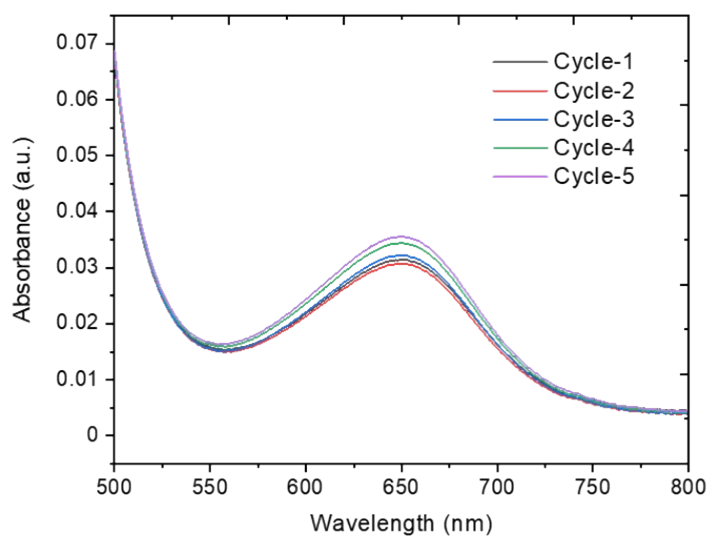

**Fig. S24** The UV-visible spectra of the aliquots collected during the cyclic stability test of Cu<sub>75</sub>Ni<sub>25</sub>@NC.

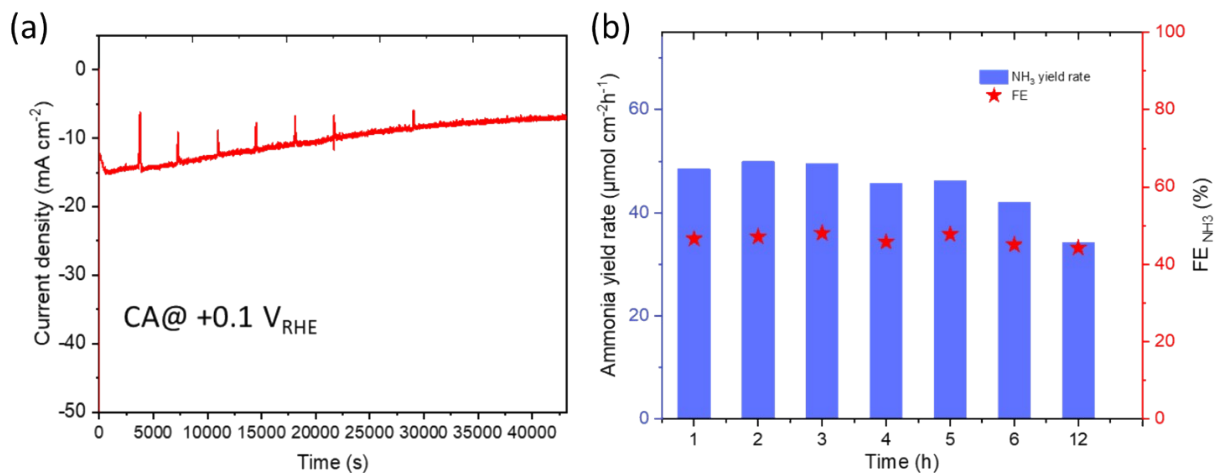

**Fig. S25** (a) Long term stability (with continuous NO flow) test of Cu<sub>75</sub>Ni<sub>25</sub>@NC, and (b) The corresponding NH<sub>3</sub> yield rate and FE<sub>NH3</sub> at different time intervals.

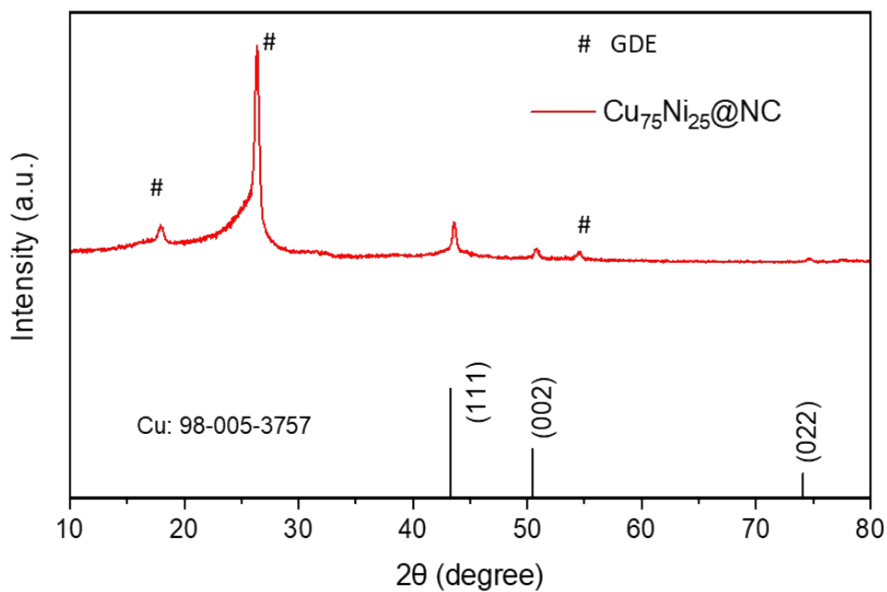

**Fig. S26** PXRD pattern of the GDE supported Cu<sub>75</sub>Ni<sub>25</sub>@NC after the stability test.

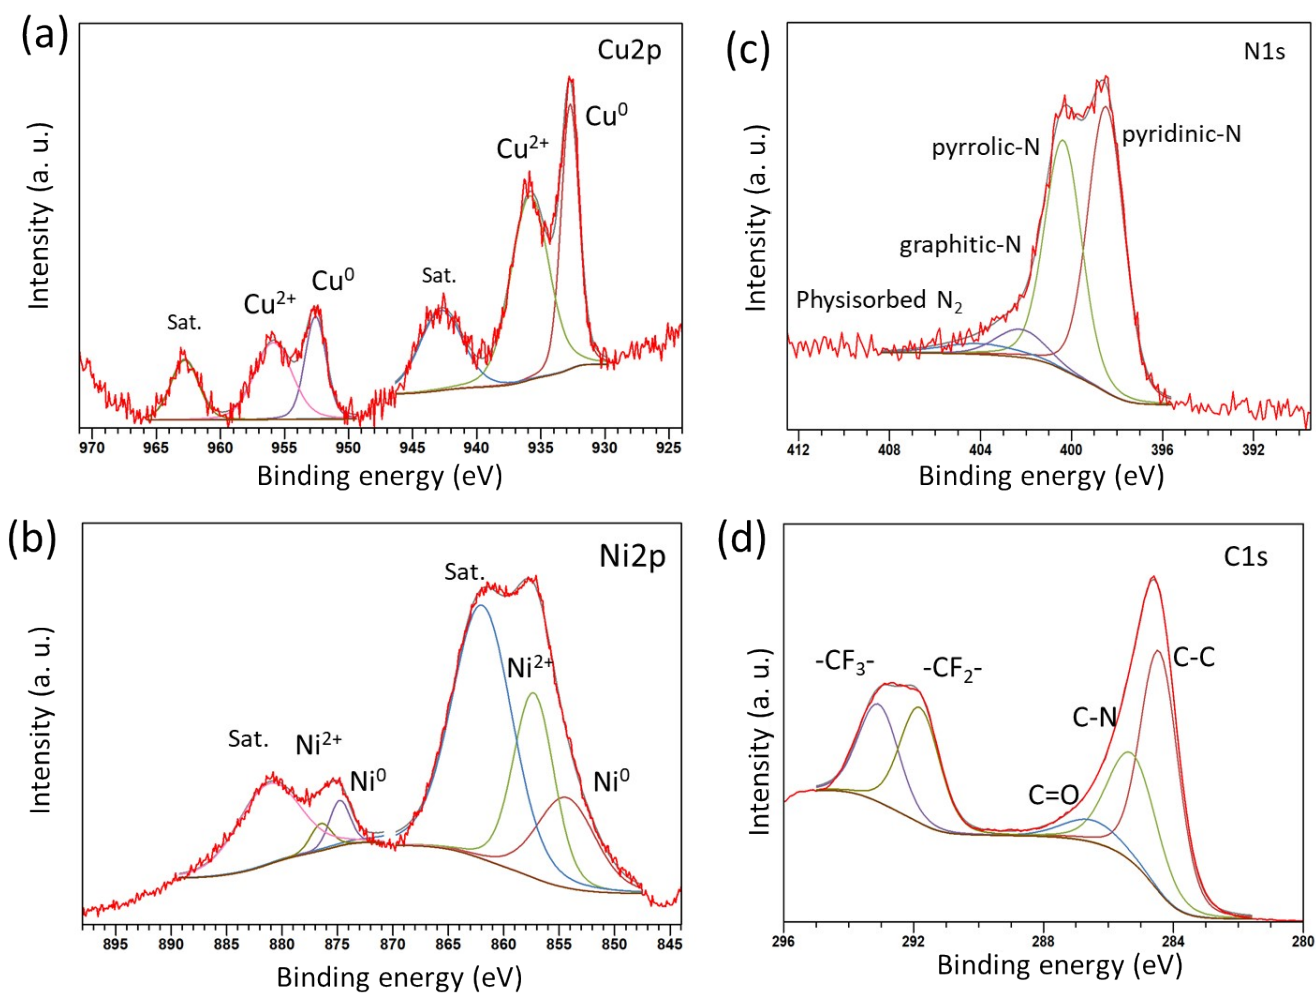

**Fig. S27** Deconvoluted XPS spectra of (a) Cu2p, (b) Ni2p, (c) N1s, and (d) C1s of Cu<sub>25</sub>Ni<sub>75</sub>@NC after the stability test.

**Table S5** ICP-OES analysis of Cu<sub>75</sub>Ni<sub>25</sub>@NC before and after the electrolysis.

| Sample                                        | Cu (ppm) | Ni (ppm) | Cu (mM) | Ni (mM) | Cu: Ni ratio |
|-----------------------------------------------|----------|----------|---------|---------|--------------|
| Cu <sub>75</sub> Ni <sub>25</sub> @NC (Fresh) | 0.139    | 0.027    | 0.0021  | 0.00046 | 4.5: 1       |
| Cu <sub>75</sub> Ni <sub>25</sub> @NC (Post)  | 0.133    | 0.03     | 0.0020  | 0.0005  | 4: 1         |

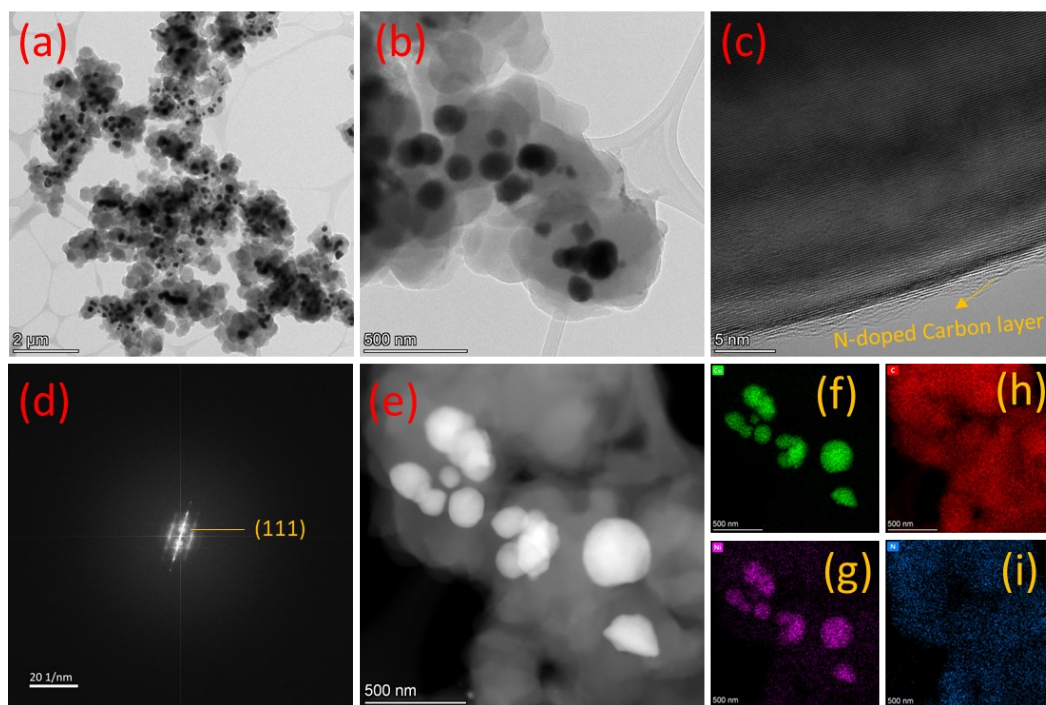

**Fig. S28** TEM analysis of  $\text{Cu}_{75}\text{Ni}_{25}@NC$  after stability test. (a-b) TEM images. (c) HRTEM image and (d) the corresponding FFT pattern. (e) HAADF image and (f-i) elemental mapping.

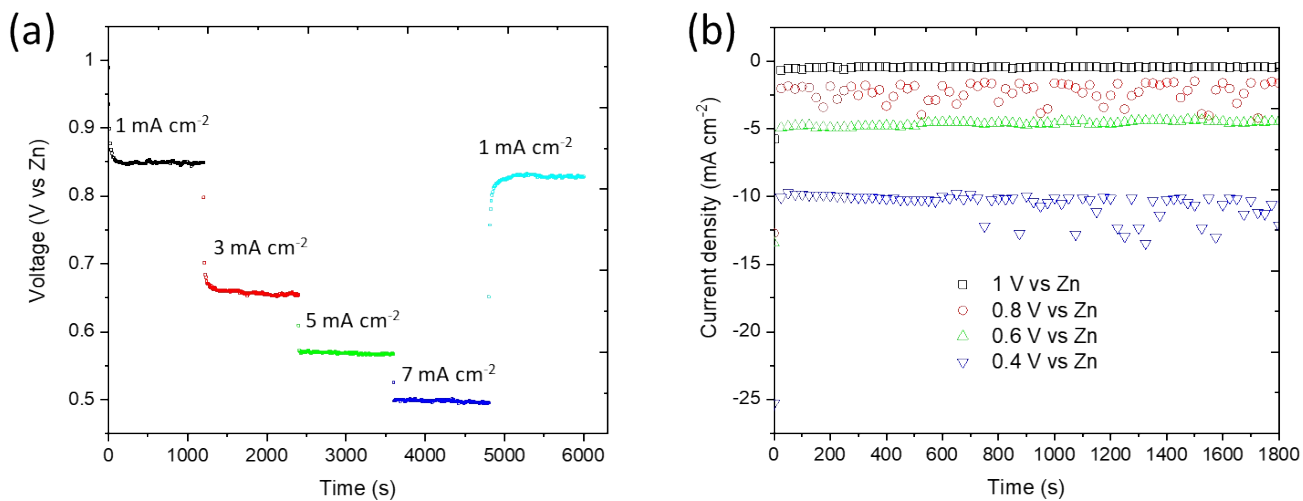

**Fig. S29** (a) Discharge curves of Cu<sub>100</sub>@NC based Zn-NO battery at different current densities.

(b) Discharge current densities of Cu<sub>100</sub>@NC based Zn-NO battery at different voltages.

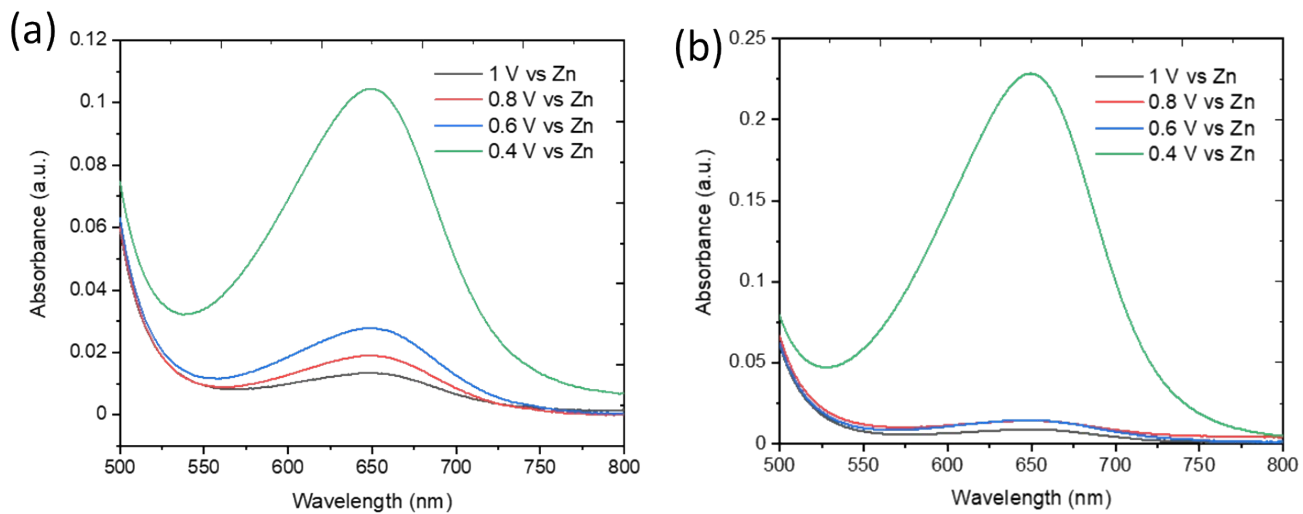

**Fig. S30** UV-visible spectra of aliquots collected after 30 min discharge of (a) Cu<sub>75</sub>Ni<sub>25</sub>@NC and

(b) Cu<sub>100</sub>@NC based Zn-NO batteries at various potentials.

**Table S6** Comparison of NH<sub>3</sub> yield rate and peak power density of our Zn-NO battery with the reported Zn-N<sub>2</sub>, and Zn-NO batteries.

| <b>Cathode</b>                            | <b>Battery systems</b> | <b>Power density (mW cm<sup>-2</sup>)</b> | <b>Ref.</b>                                                |
|-------------------------------------------|------------------------|-------------------------------------------|------------------------------------------------------------|
| Cu NPs                                    | Zn-N <sub>2</sub>      | 0.0101                                    | <i>Chem. Commun.</i> 2019, <b>55</b> , 12801               |
| CoPi/NPCS                                 | Zn-N <sub>2</sub>      | 0.49                                      | <i>ACS Appl. Mater. Interfaces</i> 2021, <b>13</b> , 12106 |
| NbS <sub>2</sub>                          | Zn-N <sub>2</sub>      | 0.31                                      | <i>Appl. Catal. B: Environ.</i> 2020, <b>270</b> , 118892  |
| Fe <sub>1.0</sub> HTNs                    | Zn-N <sub>2</sub>      | 0.0276                                    | <i>J. Mater. Chem. A</i> 2021, <b>9</b> , 4026-4035.       |
| a-B <sub>2.6</sub> C@TiO <sub>2</sub> /Ti | Zn-NO                  | 1.7                                       | <i>Angew. Chem. Int. Ed.</i> 2022, <b>61</b> , e202202087  |
| Ni <sub>2</sub> P nanoarray               | Zn-NO                  | 1.53                                      | <i>J. Mater. Chem. A</i> 2021, <b>9</b> , 24268            |
| MoS <sub>2</sub> /GF                      | Zn-NO                  | 1.04                                      | <i>Angew. Chem. Int. Ed.</i> 2021, <b>133</b> , 25467      |
| CuFe DS/NC                                | Zn-NO                  | 2.30                                      | <i>Adv. Mater.</i> 2023, <b>35</b> , 2304646               |
| Cu@Co                                     | Zn-NO                  | 3.08                                      | <i>Adv. Mater.</i> 2023, 2309470                           |
| <b>Cu<sub>75</sub>Ni<sub>25</sub>@NC</b>  | <b>Zn-NO</b>           | <b>3.8</b>                                | <b>This work</b>                                           |
